# Supplementary material for: Exome sequencing of 85 Williams–Beuren syndrome cases rules out coding variation as a major contributor to remaining variance in social behavior
Source: PubMed Central journal article supplement (PMC6160704; doi:10.1002/mgg3.429), 2018-07-15
Supplement: MGG3-6-749-s001.pdf [file MGG3-6-749-s001.pdf]

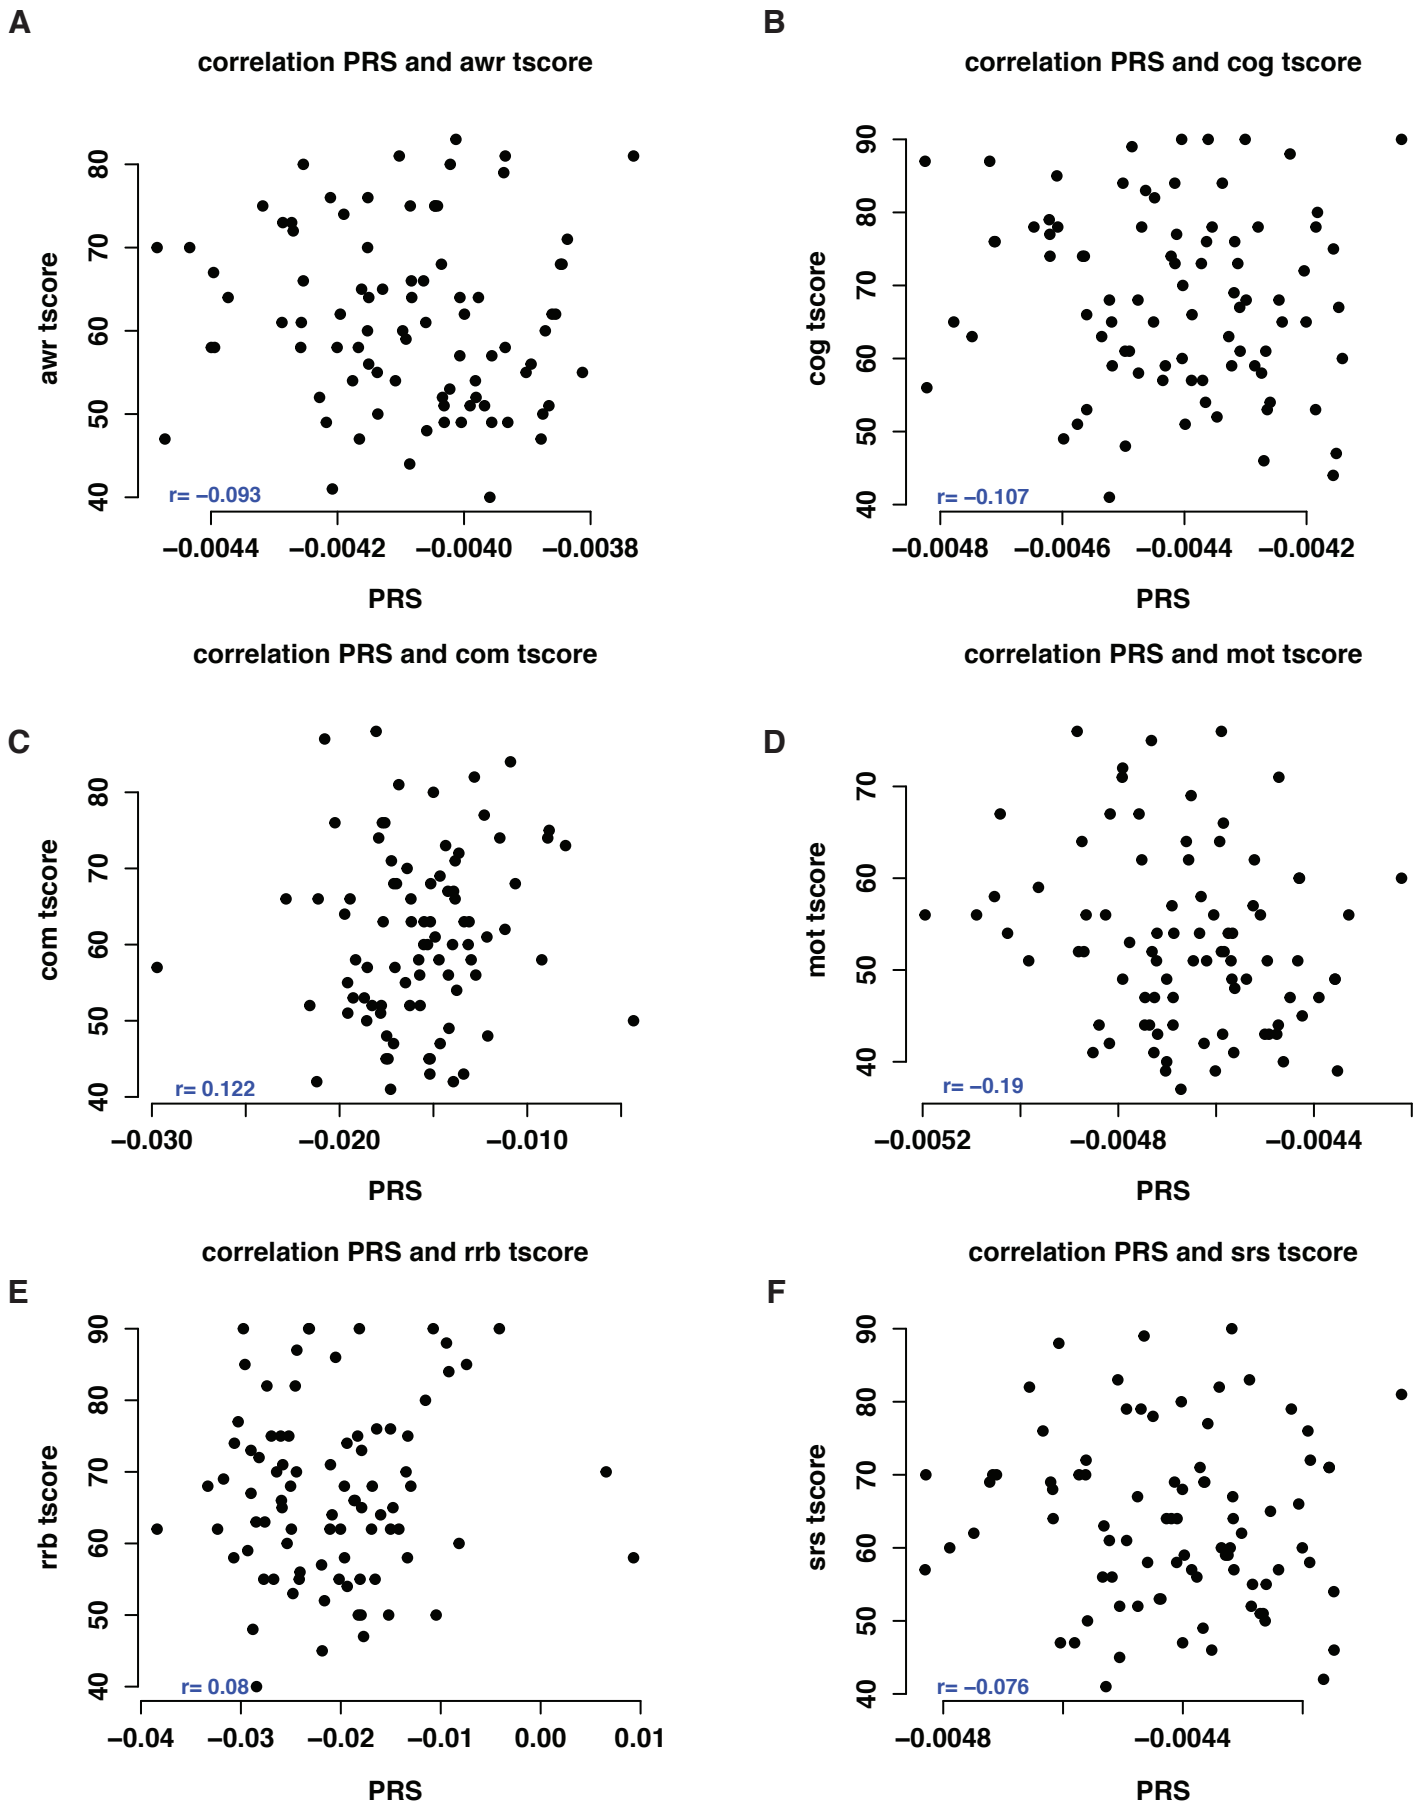

**Supplemental Figure 1: Polygenic Risk Score correlation with SRS and SRS subscores.** A-F Panels show the correlation between the polygenic risk score (PRS) for the sub score of the SRS calculated using variants from the PGC ASD GWAS that fall below the p-value threshold calculated from the best-fit PRS. Pearson correlation values between the samples PRS and the SRS subscore shown as the inset.
