# Supplementary material for: Exome sequencing of 85 Williams–Beuren syndrome cases rules out coding variation as a major contributor to remaining variance in social behavior
Source: PubMed Central journal article supplement (PMC6160704; doi:10.1002/mgg3.429), 2018-07-15
Supplement: MGG3-6-749-s002.pdf [file MGG3-6-749-s002.pdf]

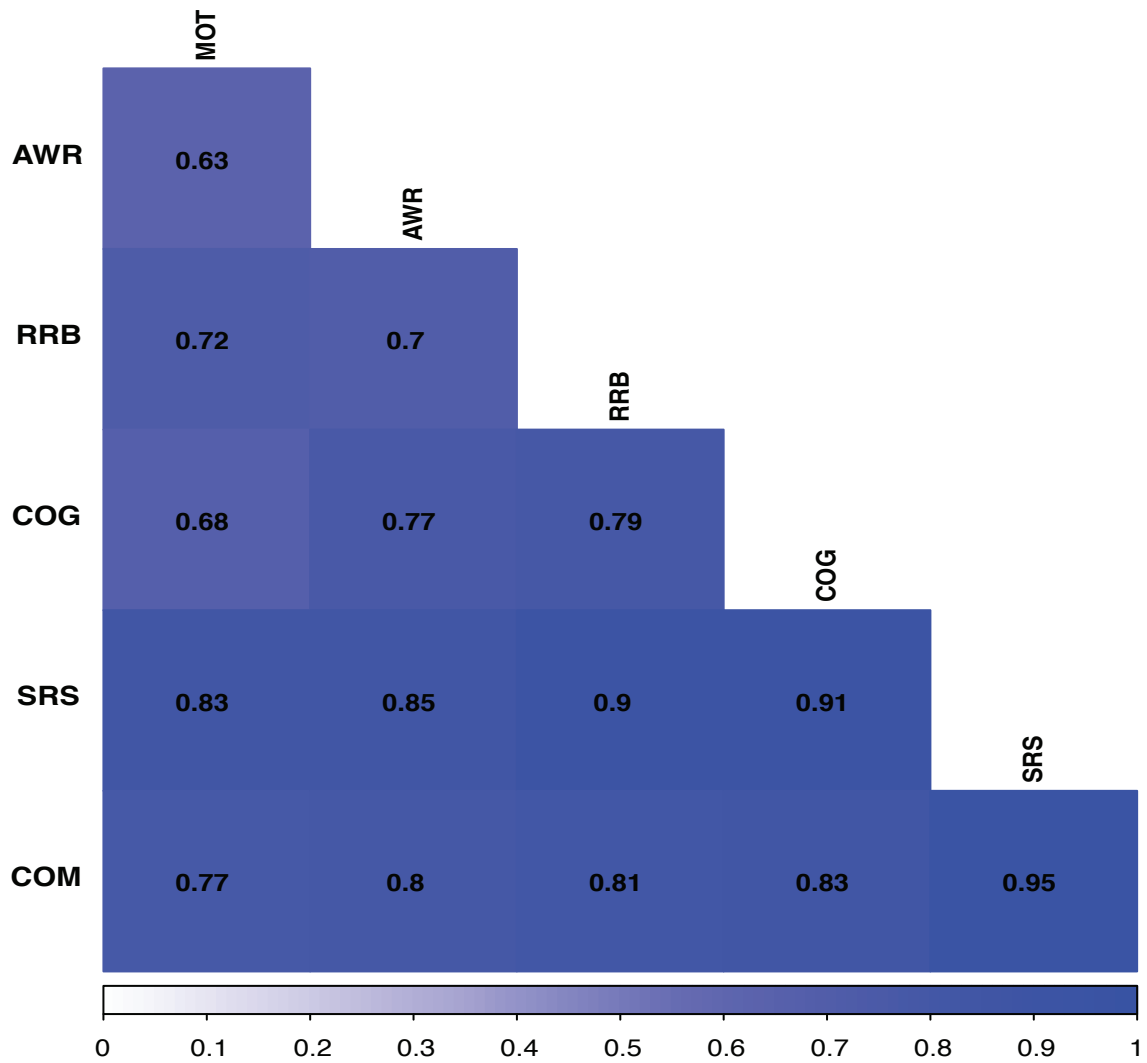

**Supplemental Figure 2: SRS and sub scales are correlated.** Heatmap display of the Pearson correlation values of the SRS and sub scale T-scores in 85 individuals with WS. Values of the correlation are labeled in the plot.
